# Supplementary material for: Mitochondrial DNA methylation profiling of the human prefrontal cortex and nucleus accumbens: correlations with aging and drug use
Source: PubMed Central journal article supplement (PMC9233363; doi:10.1186/s13148-022-01300-z), 2022-06-25
Supplement: 13148_2022_1300_MOESM2_ESM.pdf [file 13148_2022_1300_MOESM2_ESM.pdf]

Table S1. Characteristics of the cases in the Drug use group by drug type and age.

| Case no.       | Drug type                          | Age (yr) | Cause of death |
|----------------|------------------------------------|----------|----------------|
| g <sup>1</sup> | Heroin                             | 39.8     | Accident       |
| 16             | Heroin                             | 51.3     | Accident       |
| 47             | ATS <sup>2</sup> (Methamphetamine) | 37.8     | Undetermined   |
| 28             | ATS (Methamphetamine)              | 38.2     | Accident       |
| 18             | ATS (Methamphetamine)              | 41.1     | Suicide        |
| 15             | ATS (Methamphetamine)              | 54.9     | Homicide       |
| 5              | ATS (Methamphetamine)              | 59.6     | Accident       |
| 24             | ATS (Methamphetamine), Ketamine    | 21.1     | Suicide        |
| 17             | ATS (MDMA), Ketamine               | 24.2     | Suicide        |
| 45             | ATS (Mephedrone), Ketamine         | 29.6     | Homicide       |
| 57             | ATS (Mephedrone), Ketamine         | 40.8     | Homicide       |
| 44             | Ketamine                           | 20.3     | Homicide       |
| 58             | Ketamine                           | 30.4     | Natural death  |
| 20             | Ketamine                           | 35.3     | Homicide       |

<sup>1</sup> No adequate methylation data of PFC.

<sup>2</sup> Amphetamine-type stimulants.

Table S2. The cytosine sites differentially methylated between the NAcc and the PFC.

| Position | Context | Gene    | mean FoldChange<br>log2(NAcc/PFC) | P value  |
|----------|---------|---------|-----------------------------------|----------|
| 14960    | CHH     | MT-CYB  | 2.534675                          | 0.000105 |
| 13063    | CHG     | MT-ND5  | 1.248118                          | 0.000302 |
| 15240    | CHG     | MT-CYB  | 2.422021                          | 0.000559 |
| 9982     | CHH     | MT-CO3  | -0.754208                         | 0.001733 |
| 2943     | CpG     | MT-RNR2 | 0.576303                          | 0.002894 |
| 12533    | CHG     | MT-ND5  | 2.425097                          | 0.003092 |
| 13417    | CHH     | MT-ND5  | 2.298797                          | 0.003894 |
| 3238     | CHH     | MT-TL1  | -0.921570                         | 0.003902 |
| 13048    | CHH     | MT-ND5  | 0.942288                          | 0.004289 |
| 3230     | CHH     | MT-TL1  | -0.153924                         | 0.004685 |
| 13019    | CHH     | MT-ND5  | 0.485501                          | 0.004719 |
| 11887    | CHG     | MT-ND4  | 1.694087                          | 0.004949 |
| 10680    | CHH     | MT-ND4L | -2.446901                         | 0.006540 |
| 15221    | CHG     | MT-CO2  | 1.765965                          | 0.007492 |
| 7697     | CHH     | MT-CYB  | 2.441824                          | 0.007492 |
| 15798    | CHH     | MT-CYB  | 2.237583                          | 0.007956 |
| 13042    | CHG     | MT-ND5  | 0.432649                          | 0.008191 |
| 12613    | CHH     | MT-ND5  | 0.465689                          | 0.008667 |
| 2847     | CHG     | MT-RNR2 | 0.553675                          | 0.009056 |
| 14655    | CHG     | MT-CO3  | 2.400005                          | 0.009434 |
| 9932     | CHH     | MT-ND6  | 2.496524                          | 0.009434 |
| 2478     | CHG     | MT-RNR2 | 1.846079                          | 0.009763 |
| 3255     | CpG     | MT-TL1  | -0.224689                         | 0.009763 |
| 13031    | CHG     | MT-TM   | 0.386979                          | 0.010643 |
| 4407     | CHH     | MT-ND5  | 0.352742                          | 0.010643 |
| 13361    | CHH     | MT-ND5  | 0.958115                          | 0.011591 |
| 9952     | CHH     | MT-CO3  | 1.790314                          | 0.011623 |
| 4966     | CHG     | MT-ND2  | -4.271878                         | 0.012611 |
| 2477     | CpG     | MT-RNR2 | -0.248796                         | 0.012617 |
| 2889     | CHH     | MT-RNR2 | 1.155983                          | 0.012617 |
| 12610    | CHG     | MT-ND5  | 2.887912                          | 0.013149 |
| 10971    | CHG     | MT-ND1  | 1.653601                          | 0.013707 |
| 3437     | CHG     | MT-ND4  | -1.003146                         | 0.013707 |
| 12763    | CpG     | MT-ND5  | 1.067278                          | 0.014285 |
| 15215    | CHH     | MT-CYB  | 0.353558                          | 0.014285 |
| 10360    | CHH     | MT-CO1  | -1.516135                         | 0.014884 |
| 6517     | CHH     | MT-CO2  | 1.821840                          | 0.014884 |
| 7793     | CpG     | MT-ND3  | 1.125814                          | 0.014884 |
| 15959    | CHG     | MT-RNR2 | -1.598373                         | 0.016453 |
| 2608     | CHH     | MT-TP   | 1.755912                          | 0.016453 |
| 1302     | CpG     | MT-RNR1 | 3.002008                          | 0.016812 |
| 3664     | CHG     | MT-ND1  | -0.777330                         | 0.016812 |
| 9986     | CHH     | MT-CO3  | 1.238423                          | 0.018213 |
| 5293     | CHH     | MT-ND2  | 0.343021                          | 0.018805 |
| 13018    | CHH     | MT-ND5  | 2.443149                          | 0.018950 |
| 11832    | CHH     | MT-ND4  | -0.297421                         | 0.019550 |
| 12406    | CpG     | MT-ND5  | 1.644258                          | 0.019713 |
| 687      | CHH     | MT-RNR1 | 0.329352                          | 0.020501 |

Table S2. The cytosine sites differentially methylated between the NAcc and the PFC.

| Position | Context | Gene    | mean FoldChange<br>log2(NAcc/PFC) | P value  |
|----------|---------|---------|-----------------------------------|----------|
| 9253     | CHH     | MT-CO3  | 1.025250                          | 0.020501 |
| 12508    | CHH     | MT-ND5  | 1.054785                          | 0.021841 |
| 2849     | CHG     | MT-RNR2 | 0.502952                          | 0.021943 |
| 13399    | CHH     | MT-ND5  | 2.937047                          | 0.022158 |
| 1018     | CHH     | MT-RNR1 | 2.885681                          | 0.022725 |
| 12772    | CHH     | MT-ND5  | 0.955377                          | 0.023028 |
| 13368    | CHH     | MT-ND5  | 3.014761                          | 0.023028 |
| 14438    | CHG     | MT-ND6  | 0.430429                          | 0.023028 |
| 12147    | CHH     | MT-CO2  | 0.409010                          | 0.023927 |
| 15059    | CpG     | MT-TH   | 1.678780                          | 0.023927 |
| 15217    | CHH     | MT-CYB  | 1.068807                          | 0.023927 |
| 7637     | CHH     | MT-CYB  | 0.979105                          | 0.023927 |
| 15995    | CHH     | MT-TP   | 0.351518                          | 0.024586 |
| 13415    | CHH     | MT-ND5  | 2.222481                          | 0.025814 |
| 7236     | CpG     | MT-CO1  | 0.933904                          | 0.026497 |
| 10731    | CHH     | MT-TL1  | -0.376625                         | 0.026804 |
| 3277     | CHG     | MT-ND1  | -0.893526                         | 0.026804 |
| 3591     | CHG     | MT-CO3  | 0.277994                          | 0.026804 |
| 9985     | CHH     | MT-ND4L | -0.164031                         | 0.026804 |
| 9394     | CpG     | MT-CO3  | -0.193193                         | 0.027500 |
| 7640     | CHH     | MT-CO2  | 0.946887                          | 0.027825 |
| 2116     | CHH     | MT-RNR2 | -4.278887                         | 0.028879 |
| 9247     | CHG     | MT-CO3  | 2.294096                          | 0.028879 |
| 12814    | CpG     | MT-ATP6 | 0.915894                          | 0.029967 |
| 9182     | CHH     | MT-ND5  | 1.065786                          | 0.029967 |
| 9379     | CHH     | MT-CO3  | -0.254242                         | 0.030708 |
| 12517    | CHH     | MT-ND5  | -1.049504                         | 0.031846 |
| 4491     | CpG     | MT-ND2  | 1.742823                          | 0.032173 |
| 3688     | CpG     | MT-ND1  | 1.608491                          | 0.033436 |
| 2100     | CHH     | MT-RNR2 | 1.044189                          | 0.033481 |
| 15894    | CHH     | MT-TT   | 0.992856                          | 0.034232 |
| 15777    | CHH     | MT-CYB  | 0.987967                          | 0.035481 |
| 2877     | CpG     | MT-RNR2 | 1.710550                          | 0.035930 |
| 3226     | CHH     | MT-RNR2 | 2.365748                          | 0.035962 |
| 13069    | CHG     | MT-ND1  | 3.114718                          | 0.037235 |
| 3697     | CpG     | MT-ND5  | 1.079706                          | 0.037235 |
| 8153     | CHG     | MT-CO2  | -3.637100                         | 0.037351 |
| 10472    | CHH     | MT-ND4L | 2.283901                          | 0.038096 |
| 15797    | CHH     | MT-CYB  | 1.012841                          | 0.038578 |
| 12871    | CpG     | MT-ND5  | -1.049435                         | 0.039961 |
| 769      | CHG     | MT-RNR1 | 1.626240                          | 0.040342 |
| 2844     | CpG     | MT-RNR2 | 2.271105                          | 0.041384 |
| 8187     | CHH     | MT-CO2  | 1.030219                          | 0.041899 |
| 11414    | CHH     | MT-ND4  | 1.562436                          | 0.042850 |
| 11518    | CHG     | MT-ND4  | -0.466364                         | 0.042850 |
| 12226    | CHG     | MT-TS2  | 1.615493                          | 0.042850 |
| 658      | CHH     | MT-RNR1 | 1.078407                          | 0.043819 |
| 10662    | CHH     | MT-CO2  | -2.959321                         | 0.044358 |

Table S2. The cytosine sites differentially methylated between the NAcc and the PFC.

| Position | Context | Gene    | mean FoldChange<br>log <sub>2</sub> (NAcc/PFC) | P value  |
|----------|---------|---------|------------------------------------------------|----------|
| 8219     | CHH     | MT-ND4L | 0.451397                                       | 0.044358 |
| 1007     | CHH     | MT-RNR1 | 2.879383                                       | 0.044809 |
| 6537     | CHG     | MT-CO1  | 0.385805                                       | 0.045359 |
| 10677    | CpG     | MT-ND4L | -2.286275                                      | 0.045909 |
| 13085    | CHH     | MT-ND5  | 1.679298                                       | 0.045909 |
| 11346    | CHH     | MT-ND4  | 0.998266                                       | 0.047505 |
| 15246    | CHH     | MT-CYB  | 0.367104                                       | 0.047505 |
| 12372    | CHG     | MT-ND5  | -1.002590                                      | 0.048120 |
| 13477    | CHH     | MT-ND5  | 0.301089                                       | 0.049146 |

Table S3. The cytosine sites correlated with aging in the Nacc.

| Position | Context | Gene    | slope      | P value  |
|----------|---------|---------|------------|----------|
| 2655     | CHG     | MT-RNR2 | 191.712305 | 0.002612 |
| 5353     | CpG     | MT-ND2  | 103.413259 | 0.002976 |
| 15043    | CHH     | MT-CYB  | 188.317080 | 0.003089 |
| 877      | CHH     | MT-RNR1 | 145.381575 | 0.003264 |
| 11226    | CHH     | MT-ND4  | 100.337045 | 0.003986 |
| 3538     | CHH     | MT-ND1  | 101.326788 | 0.004539 |
| 2435     | CHG     | MT-RNR2 | 106.579818 | 0.005849 |
| 878      | CHH     | MT-RNR1 | 118.175208 | 0.005854 |
| 11196    | CHH     | MT-ND4  | 139.599503 | 0.006337 |
| 7757     | CpG     | MT-CO2  | 138.547547 | 0.006949 |
| 9142     | CHG     | MT-ATP6 | 112.202771 | 0.007836 |
| 3745     | CHH     | MT-ND1  | 130.164296 | 0.007844 |
| 11150    | CHH     | MT-ND4  | 125.004041 | 0.008537 |
| 15217    | CHH     | MT-CYB  | 108.959260 | 0.010472 |
| 9253     | CHH     | MT-CO3  | 99.988934  | 0.010650 |
| 8152     | CpG     | MT-CO2  | 125.516940 | 0.012441 |
| 3550     | CpG     | MT-ND1  | 98.614397  | 0.012788 |
| 2174     | CHH     | MT-RNR2 | 145.148244 | 0.012953 |
| 12192    | CpG     | MT-TH   | 98.037953  | 0.014305 |
| 14869    | CHG     | MT-CYB  | 73.084565  | 0.015466 |
| 3850     | CHH     | MT-ND1  | 116.657201 | 0.016685 |
| 3315     | CHH     | MT-ND1  | 99.357768  | 0.017163 |
| 15216    | CHH     | MT-CYB  | 96.759935  | 0.017337 |
| 15221    | CHG     | MT-CYB  | 92.253281  | 0.017505 |
| 11963    | CHH     | MT-ND4  | 78.504867  | 0.017931 |
| 3882     | CHH     | MT-ND1  | 88.900004  | 0.018733 |
| 2068     | CHH     | MT-RNR2 | 150.907633 | 0.019303 |
| 9025     | CHG     | MT-ATP6 | 118.867978 | 0.019980 |
| 9026     | CHH     | MT-ATP6 | 113.937700 | 0.020006 |
| 3698     | CHG     | MT-ND1  | 92.736418  | 0.021131 |
| 3424     | CHH     | MT-ND1  | 87.704629  | 0.021517 |
| 13590    | CHG     | MT-ND5  | 108.205599 | 0.022775 |
| 11225    | CHH     | MT-ND4  | 107.793088 | 0.022835 |
| 6541     | CpG     | MT-CO1  | 75.658440  | 0.023026 |
| 11184    | CpG     | MT-ND4  | 122.392286 | 0.024573 |
| 15005    | CpG     | MT-CYB  | 133.032867 | 0.025646 |
| 11176    | CHG     | MT-ND4  | 150.028472 | 0.026661 |
| 3922     | CpG     | MT-ND1  | 94.877244  | 0.027390 |
| 15240    | CHG     | MT-CYB  | 86.319916  | 0.027439 |
| 5460     | CpG     | MT-ND2  | 103.176472 | 0.027759 |
| 7779     | CHG     | MT-CO2  | 92.219915  | 0.028522 |
| 3849     | CHH     | MT-ND1  | 97.005552  | 0.028678 |
| 2070     | CHH     | MT-RNR2 | 143.315456 | 0.029953 |
| 7789     | CHG     | MT-CO2  | 91.149968  | 0.031334 |
| 8517     | CHG     | MT-ATP8 | 105.395742 | 0.031434 |

Table S3. The cytosine sites correlated with aging in the Nacc.

| Position | Context | Gene    | slope      | P value  |
|----------|---------|---------|------------|----------|
| 3877     | CHH     | MT-ND1  | 106.221977 | 0.031977 |
| 9266     | CHH     | MT-CO3  | 101.779514 | 0.033360 |
| 3412     | CHH     | MT-ND1  | 72.942641  | 0.033680 |
| 664      | CHH     | MT-RNR1 | 92.188088  | 0.033951 |
| 658      | CHH     | MT-RNR1 | 76.978958  | 0.035844 |
| 7664     | CpG     | MT-CO2  | 79.849276  | 0.036244 |
| 12185    | CHH     | MT-TH   | 69.541794  | 0.037578 |
| 3776     | CHH     | MT-ND1  | 78.227952  | 0.037974 |
| 3531     | CpG     | MT-ND1  | 47.971175  | 0.039354 |
| 3693     | CHG     | MT-ND1  | 74.937292  | 0.039386 |
| 6967     | CHH     | MT-CO1  | 112.806823 | 0.039826 |
| 12183    | CHG     | MT-TH   | 71.734967  | 0.040789 |
| 13288    | CpG     | MT-ND5  | 102.241298 | 0.041405 |
| 5828     | CHH     | MT-TY   | 99.960671  | 0.043993 |
| 872      | CHG     | MT-RNR1 | 105.756736 | 0.044296 |
| 4376     | CpG     | MT-TQ   | 71.887274  | 0.045020 |
| 14861    | CpG     | MT-CYB  | 60.320604  | 0.045099 |
| 13268    | CHH     | MT-ND5  | 104.021363 | 0.046530 |
| 3665     | CHH     | MT-ND1  | 65.502290  | 0.046849 |
| 9182     | CHH     | MT-ATP6 | 72.534625  | 0.046967 |
| 2976     | CHH     | MT-RNR2 | 94.764700  | 0.047128 |
| 2421     | CHG     | MT-RNR2 | 58.308128  | 0.047551 |
| 10704    | CHH     | MT-ND4L | 95.331087  | 0.048258 |
| 3842     | CHH     | MT-ND1  | 74.633382  | 0.048388 |
| 11222    | CHH     | MT-ND4  | 106.609833 | 0.048934 |

Table S4. The cytosine sites correlated with aging in the PFC.

| Position | Context | Gene    | slope       | P value  |
|----------|---------|---------|-------------|----------|
| 2684     | CHG     | MT-RNR2 | 168.765377  | 0.000526 |
| 8921     | CHH     | MT-ATP6 | 116.713437  | 0.001168 |
| 6363     | CHG     | MT-CO1  | 215.377896  | 0.005551 |
| 10266    | CHH     | MT-ND3  | 139.992093  | 0.006121 |
| 3357     | CHH     | MT-ND1  | 89.235406   | 0.007237 |
| 15356    | CHG     | MT-CYB  | 168.621275  | 0.008555 |
| 3877     | CHH     | MT-ND1  | 114.234812  | 0.012269 |
| 4812     | CHH     | MT-ND2  | 111.993646  | 0.012673 |
| 3913     | CHH     | MT-ND1  | 111.193047  | 0.013427 |
| 8873     | CHH     | MT-ATP6 | 110.971437  | 0.013839 |
| 11559    | CHH     | MT-ND4  | 101.027136  | 0.014082 |
| 3358     | CHH     | MT-ND1  | 87.911714   | 0.014475 |
| 3235     | CHH     | MT-TL1  | 108.331948  | 0.014598 |
| 8920     | CHH     | MT-ATP6 | 92.682785   | 0.015162 |
| 3427     | CHH     | MT-ND1  | 81.602840   | 0.015827 |
| 2170     | CHH     | MT-RNR2 | 101.596529  | 0.017635 |
| 2788     | CHH     | MT-RNR2 | -139.203711 | 0.018447 |
| 1361     | CHH     | MT-RNR1 | 84.508048   | 0.018501 |
| 3424     | CHH     | MT-ND1  | 75.155997   | 0.018705 |
| 13001    | CHH     | MT-ND5  | 108.595805  | 0.020331 |
| 3352     | CpG     | MT-ND1  | 84.051114   | 0.020339 |
| 2996     | CHH     | MT-RNR2 | 111.944900  | 0.021946 |
| 12821    | CHG     | MT-ND5  | -145.941396 | 0.023751 |
| 6383     | CHH     | MT-CO1  | 115.130011  | 0.024157 |
| 10522    | CHH     | MT-ND4L | 101.246930  | 0.025497 |
| 8581     | CpG     | MT-ATP6 | 123.031358  | 0.026997 |
| 3882     | CHH     | MT-ND1  | 82.263995   | 0.027267 |
| 11408    | CHH     | MT-ND4  | 72.739092   | 0.027676 |
| 3337     | CHH     | MT-ND1  | 80.419282   | 0.028649 |
| 10662    | CHH     | MT-ND4L | 92.941071   | 0.028730 |
| 3014     | CHH     | MT-RNR2 | 104.038152  | 0.029684 |
| 11407    | CHH     | MT-ND4  | 92.976559   | 0.029696 |
| 5224     | CHH     | MT-ND2  | 73.128289   | 0.029998 |
| 11396    | CHH     | MT-ND4  | 94.540790   | 0.030051 |
| 8856     | CpG     | MT-ATP6 | 92.209491   | 0.030121 |
| 4794     | CHH     | MT-ND2  | 76.735203   | 0.030344 |
| 2836     | CHH     | MT-RNR2 | -104.164426 | 0.032823 |
| 10143    | CpG     | MT-ND3  | 93.178658   | 0.033263 |
| 2688     | CHG     | MT-RNR2 | 114.646256  | 0.033473 |
| 10023    | CHH     | MT-TG   | 54.435245   | 0.033528 |
| 10677    | CpG     | MT-ND4L | 78.193638   | 0.034998 |
| 3659     | CHG     | MT-ND1  | 113.975539  | 0.037969 |
| 11546    | CHH     | MT-ND4  | 109.581996  | 0.038319 |
| 3316     | CHH     | MT-ND1  | 75.058304   | 0.038734 |
| 1336     | CHH     | MT-RNR1 | 72.325673   | 0.040016 |

Table S4. The cytosine sites correlated with aging in the PFC.

| Position | Context | Gene    | slope       | P value  |
|----------|---------|---------|-------------|----------|
| 6166     | CHG     | MT-CO1  | 58.382521   | 0.040747 |
| 10671    | CpG     | MT-ND4L | 98.905268   | 0.040918 |
| 4563     | CHH     | MT-ND2  | -120.235027 | 0.041029 |
| 3907     | CHH     | MT-ND1  | 104.545487  | 0.041649 |
| 2915     | CpG     | MT-RNR2 | 91.645428   | 0.041690 |
| 7197     | CpG     | MT-CO1  | 130.567497  | 0.042132 |
| 9445     | CpG     | MT-CO3  | 117.530616  | 0.042570 |
| 8392     | CHH     | MT-ATP8 | 100.944330  | 0.043734 |
| 11414    | CHH     | MT-ND4  | 88.202210   | 0.043980 |
| 8969     | CHG     | MT-ATP6 | 82.835485   | 0.044266 |
| 8989     | CHH     | MT-ATP6 | 76.985015   | 0.044386 |
| 10683    | CHG     | MT-ND4L | 98.525302   | 0.045494 |
| 4378     | CHH     | MT-TQ   | 57.764292   | 0.045928 |
| 11657    | CHG     | MT-ND4  | 130.286374  | 0.046609 |
| 12876    | CpG     | MT-ND5  | 46.131835   | 0.047071 |
| 3526     | CpG     | MT-ND1  | 57.772156   | 0.047457 |
| 9002     | CpG     | MT-ATP6 | 115.142650  | 0.047567 |
| 12997    | CHG     | MT-ND5  | 104.305140  | 0.047968 |
| 10230    | CHH     | MT-ND3  | 82.674709   | 0.048224 |
| 1345     | CHH     | MT-RNR1 | 84.999680   | 0.048274 |
| 12891    | CHH     | MT-ND5  | 49.434654   | 0.048684 |
| 2847     | CHG     | MT-RNR2 | -149.887075 | 0.048839 |
| 3849     | CHH     | MT-ND1  | 81.780477   | 0.049006 |
| 3901     | CpG     | MT-ND1  | 87.822231   | 0.049501 |
| 3001     | CHG     | MT-RNR2 | 77.740940   | 0.049552 |



Table S5. The cytosine sites differentially methylated between the control group and the drug use group in the Nacc.

| Position | Context | Gene    | log(OR)   | P value  |
|----------|---------|---------|-----------|----------|
| 15045    | CpG     | MT-CYB  | -1.902307 | 0.009206 |
| 9329     | CpG     | MT-CO3  | -1.424542 | 0.010090 |
| 10998    | CHH     | MT-ND4  | -0.977218 | 0.011662 |
| 2735     | CHH     | MT-RNR2 | -1.646361 | 0.012577 |
| 12186    | CHH     | MT-TH   | -1.840291 | 0.016137 |
| 15731    | CHH     | MT-CYB  | -1.631249 | 0.019758 |
| 10646    | CHH     | MT-ND4L | 1.035990  | 0.022119 |
| 6909     | CHG     | MT-CO1  | -1.256600 | 0.022824 |
| 15500    | CpG     | MT-CYB  | -1.137258 | 0.022918 |
| 1247     | CHH     | MT-RNR1 | -1.372070 | 0.025172 |
| 9715     | CHH     | MT-CO3  | -1.240558 | 0.025886 |
| 6513     | CHG     | MT-CO1  | -1.018119 | 0.026844 |
| 15317    | CHG     | MT-CYB  | -0.986101 | 0.031009 |
| 7198     | CHG     | MT-CO1  | -1.197759 | 0.033005 |
| 9663     | CHH     | MT-CO3  | -0.557318 | 0.033772 |
| 13368    | CHH     | MT-ND5  | -1.328611 | 0.034311 |
| 9382     | CpG     | MT-CO3  | -1.141040 | 0.034527 |
| 5821     | CpG     | MT-TC   | -1.433892 | 0.034541 |
| 2849     | CHG     | MT-RNR2 | -0.887681 | 0.034617 |
| 11891    | CHH     | MT-ND4  | 0.916201  | 0.034695 |
| 10994    | CHH     | MT-ND4  | -0.702439 | 0.035854 |
| 6931     | CHH     | MT-CO1  | -1.054660 | 0.036189 |
| 2067     | CHH     | MT-RNR2 | 0.766073  | 0.036225 |
| 3666     | CHH     | MT-ND1  | -1.029127 | 0.036861 |
| 2877     | CpG     | MT-RNR2 | -1.259468 | 0.039158 |
| 8187     | CHH     | MT-CO2  | -1.414488 | 0.039413 |
| 6504     | CHG     | MT-CO1  | -0.999714 | 0.040080 |
| 6516     | CHG     | MT-CO1  | -0.769162 | 0.040285 |
| 9690     | CHH     | MT-CO3  | -0.980203 | 0.041057 |
| 1278     | CHH     | MT-RNR1 | 0.705902  | 0.041058 |
| 10695    | CHH     | MT-ND4L | 1.049654  | 0.041369 |
| 15215    | CHH     | MT-CYB  | -1.103971 | 0.041400 |
| 10993    | CHH     | MT-ND4  | -0.584246 | 0.042977 |
| 13730    | CHH     | MT-ND5  | -1.194738 | 0.046980 |
| 11016    | CHG     | MT-ND4  | -0.556497 | 0.048686 |

Table S6. The cytosine sites differentially methylated between the control group and the drug use group in the PFC.

| Position | Context | Gene    | log(OR)   | P value  |
|----------|---------|---------|-----------|----------|
| 15926    | CpG     | MT-TT   | -2.782649 | 0.006109 |
| 1474     | CpG     | MT-RNR1 | -2.775811 | 0.007182 |
| 785      | CpG     | MT-RNR1 | 3.790019  | 0.007961 |
| 7928     | CpG     | MT-CO2  | -2.709109 | 0.008239 |
| 1350     | CHH     | MT-RNR1 | -1.769737 | 0.009507 |
| 9715     | CHH     | MT-CO3  | -2.238095 | 0.009633 |
| 8998     | CpG     | MT-ATP6 | -2.335727 | 0.010046 |
| 10375    | CHH     | MT-ND3  | 1.984035  | 0.011339 |
| 2236     | CHH     | MT-RNR2 | -2.179149 | 0.015354 |
| 9628     | CHH     | MT-CO3  | -1.741051 | 0.015721 |
| 1910     | CHH     | MT-RNR2 | 2.211924  | 0.015949 |
| 3712     | CHG     | MT-ND1  | -2.766741 | 0.017162 |
| 13204    | CHG     | MT-ND5  | -1.964700 | 0.018025 |
| 3437     | CHG     | MT-ND1  | -1.653585 | 0.018535 |
| 9295     | CHG     | MT-CO3  | -1.472496 | 0.018958 |
| 6182     | CpG     | MT-CO1  | -1.223466 | 0.019047 |
| 7467     | CHH     | MT-TS1  | 1.630909  | 0.019069 |
| 12294    | CHH     | MT-TL2  | -2.423222 | 0.020387 |
| 12763    | CpG     | MT-ND5  | 2.518802  | 0.020833 |
| 1030     | CHH     | MT-RNR1 | 1.103853  | 0.021820 |
| 12962    | CHH     | MT-ND5  | -1.714890 | 0.022096 |
| 2546     | CHG     | MT-RNR2 | -2.557151 | 0.022417 |
| 1290     | CHH     | MT-RNR1 | -2.927014 | 0.022666 |
| 2695     | CHH     | MT-RNR2 | -2.127394 | 0.022730 |
| 10726    | CHH     | MT-ND4L | -1.379262 | 0.022955 |
| 3698     | CHG     | MT-ND1  | -2.211753 | 0.023124 |
| 3718     | CHH     | MT-ND1  | 1.130750  | 0.023691 |
| 15216    | CHH     | MT-CYB  | -2.143758 | 0.024078 |
| 1923     | CHH     | MT-RNR2 | 1.669285  | 0.024229 |
| 15240    | CHG     | MT-CYB  | -1.520491 | 0.025287 |
| 9621     | CpG     | MT-CO3  | -1.315895 | 0.025663 |
| 2700     | CpG     | MT-RNR2 | -2.318352 | 0.026316 |
| 2867     | CHH     | MT-RNR2 | -1.771011 | 0.027430 |
| 15439    | CHH     | MT-CYB  | 1.575756  | 0.027515 |
| 12946    | CHH     | MT-ND5  | -1.765767 | 0.027875 |
| 9276     | CHG     | MT-CO3  | -1.938608 | 0.028114 |
| 1930     | CHG     | MT-RNR2 | 1.993321  | 0.028402 |
| 10360    | CHH     | MT-ND3  | 1.627151  | 0.028574 |
| 15945    | CHH     | MT-TT   | 1.637331  | 0.028617 |
| 15346    | CHH     | MT-CYB  | -2.078918 | 0.029006 |
| 3607     | CHH     | MT-ND1  | -1.731034 | 0.030671 |
| 14439    | CHH     | MT-ND6  | 1.061583  | 0.030851 |
| 1748     | CHH     | MT-RNR2 | -1.980682 | 0.030954 |
| 11274    | CHH     | MT-ND4  | -1.482117 | 0.030976 |

Table S6. The cytosine sites differentially methylated between the control group and the drug use group in the PFC.

| Position | Context | Gene    | log(OR)   | P value  |
|----------|---------|---------|-----------|----------|
| 12929    | CHH     | MT-ND5  | -1.397422 | 0.031116 |
| 13031    | CHG     | MT-ND5  | 0.957055  | 0.031151 |
| 15356    | CHG     | MT-CYB  | -2.389609 | 0.031289 |
| 9962     | CHG     | MT-CO3  | 1.484173  | 0.031787 |
| 904      | CHH     | MT-RNR1 | -1.885682 | 0.031933 |
| 10407    | CHH     | MT-TR   | 1.371768  | 0.032865 |
| 11478    | CHG     | MT-ND4  | -1.853610 | 0.033116 |
| 12533    | CHG     | MT-ND5  | 1.600071  | 0.033466 |
| 2400     | CHH     | MT-RNR2 | 0.744453  | 0.033843 |
| 2771     | CHH     | MT-RNR2 | -1.602775 | 0.035000 |
| 3915     | CHH     | MT-ND1  | -2.008851 | 0.035387 |
| 3438     | CHH     | MT-ND1  | -1.273326 | 0.035880 |
| 1179     | CHG     | MT-RNR1 | -1.276065 | 0.035956 |
| 12816    | CHG     | MT-ND5  | -1.793651 | 0.036355 |
| 2019     | CHH     | MT-RNR2 | -1.577382 | 0.037247 |
| 10144    | CHG     | MT-ND3  | -1.507424 | 0.038172 |
| 4333     | CHH     | MT-TQ   | 1.569753  | 0.038285 |
| 2397     | CHH     | MT-RNR2 | 0.795473  | 0.038835 |
| 2698     | CHH     | MT-RNR2 | -1.711323 | 0.039067 |
| 15173    | CHH     | MT-CYB  | -1.314334 | 0.039294 |
| 15152    | CHH     | MT-CYB  | -1.248503 | 0.039918 |
| 1833     | CHH     | MT-RNR2 | 1.733785  | 0.040710 |
| 7287     | CHH     | MT-CO1  | 1.059915  | 0.041100 |
| 14226    | CpG     | MT-ND6  | 1.374925  | 0.041218 |
| 15452    | CHH     | MT-CYB  | 0.952848  | 0.041437 |
| 6180     | CHH     | MT-CO1  | -1.121037 | 0.041988 |
| 626      | CHG     | MT-TF   | -1.251900 | 0.042640 |
| 1476     | CpG     | MT-RNR1 | -1.985890 | 0.042726 |
| 3918     | CHH     | MT-ND1  | -1.688908 | 0.042838 |
| 11561    | CHH     | MT-ND4  | -1.171793 | 0.043389 |
| 7984     | CHG     | MT-CO2  | 1.107595  | 0.043450 |
| 6618     | CpG     | MT-CO1  | -1.256818 | 0.043589 |
| 7164     | CpG     | MT-CO1  | 0.953957  | 0.043699 |
| 8126     | CHH     | MT-CO2  | -1.175517 | 0.043785 |
| 3436     | CpG     | MT-ND1  | -1.051309 | 0.045583 |
| 15153    | CHH     | MT-CYB  | -1.433824 | 0.045699 |
| 7327     | CHH     | MT-CO1  | 1.124382  | 0.047046 |
| 5140     | CHG     | MT-ND2  | -1.177871 | 0.047645 |
| 3693     | CHG     | MT-ND1  | -1.238827 | 0.047708 |
| 12756    | CHG     | MT-ND5  | 2.946916  | 0.047816 |
| 5226     | CHH     | MT-ND2  | 0.595517  | 0.048049 |
| 627      | CHH     | MT-TF   | -1.577229 | 0.048194 |
| 7341     | CpG     | MT-CO1  | 1.478544  | 0.048568 |

Table S7. The metadata of the deceased.

| Case no. | drug use group | Batch | Doctor collecting tissue | Alcohol intake | Postmortem interval >6 hours |
|----------|----------------|-------|--------------------------|----------------|------------------------------|
| 2        | No             | A     | B                        | Yes            | No                           |
| 3        | No             | A     | B                        | No             | No                           |
| 4        | No             | A     | B                        | Yes            | Yes                          |
| 5        | Yes            | A     | A                        | No             | No                           |
| 6        | No             | A     | A                        | No             | Yes                          |
| 7        | No             | A     | A                        | No             | No                           |
| 8        | Yes            | A     | B                        | Yes            | No                           |
| 9        | No             | A     | B                        | Yes            | No                           |
| 10       | No             | A     | A                        | No             | No                           |
| 11       | No             | A     | A                        | No             | No                           |
| 12       | No             | A     | B                        | No             | No                           |
| 13       | No             | A     | B                        | No             | No                           |
| 14       | No             | A     | B                        | No             | No                           |
| 15       | Yes            | A     | A                        | No             | No                           |
| 16       | Yes            | B     | B                        | No             | Yes                          |
| 17       | Yes            | B     | A                        | No             | Yes                          |
| 18       | Yes            | B     | A                        | No             | No                           |
| 19       | No             | B     | A                        | No             | No                           |
| 20       | Yes            | B     | A                        | No             | Yes                          |
| 21       | No             | B     | A                        | No             | No                           |
| 22       | No             | B     | A                        | No             | No                           |
| 23       | No             | B     | B                        | No             | Yes                          |
| 24       | Yes            | B     | B                        | No             | Yes                          |
| 25       | No             | B     | A                        | No             | Yes                          |
| 26       | No             | B     | A                        | No             | No                           |
| 27       | No             | B     | B                        | No             | No                           |
| 28       | Yes            | B     | B                        | No             | Yes                          |
| 29       | No             | B     | B                        | No             | No                           |
| 30       | No             | B     | B                        | No             | Yes                          |
| 34       | No             | B     | A                        | No             | No                           |
| 35       | No             | B     | A                        | No             | No                           |
| 36       | No             | B     | B                        | No             | No                           |
| 37       | No             | B     | A                        | No             | No                           |
| 38       | No             | B     | A                        | No             | No                           |
| 39       | No             | C     | B                        | No             | No                           |
| 40       | No             | C     | A                        | No             | No                           |
| 41       | No             | C     | B                        | No             | No                           |
| 42       | No             | C     | A                        | No             | No                           |
| 43       | No             | C     | A                        | No             | Yes                          |
| 44       | Yes            | C     | A                        | Yes            | No                           |
| 45       | Yes            | C     | B                        | No             | No                           |
| 46       | No             | C     | A                        | No             | No                           |
| 47       | Yes            | C     | A                        | No             | No                           |
| 51       | No             | C     | B                        | No             | No                           |
| 52       | No             | C     | A                        | Yes            | Yes                          |
| 53       | No             | C     | B                        | No             | No                           |

Table S7. The metadata of the deceased.

| Case no. | drug use group | Batch | Doctor collecting tissue | Alcohol intake | Postmortem interval >6 hours |
|----------|----------------|-------|--------------------------|----------------|------------------------------|
| 54       | No             | C     | A                        | Yes            | No                           |
| 55       | No             | C     | B                        | Yes            | No                           |
| 56       | No             | C     | A                        | No             | No                           |
| 57       | Yes            | C     | A                        | No             | No                           |
| 58       | Yes            | C     | B                        | No             | No                           |
| 59       | No             | C     | A                        | Yes            | No                           |
| 60       | No             | C     | A                        | No             | No                           |
